# Supplementary material for: The saccharibacterium TM7x elicits differential responses across its host range
Source: PubMed Central journal article supplement (PMC7784981; doi:10.1038/s41396-020-00736-6), 2020-08-24

Figure S2.

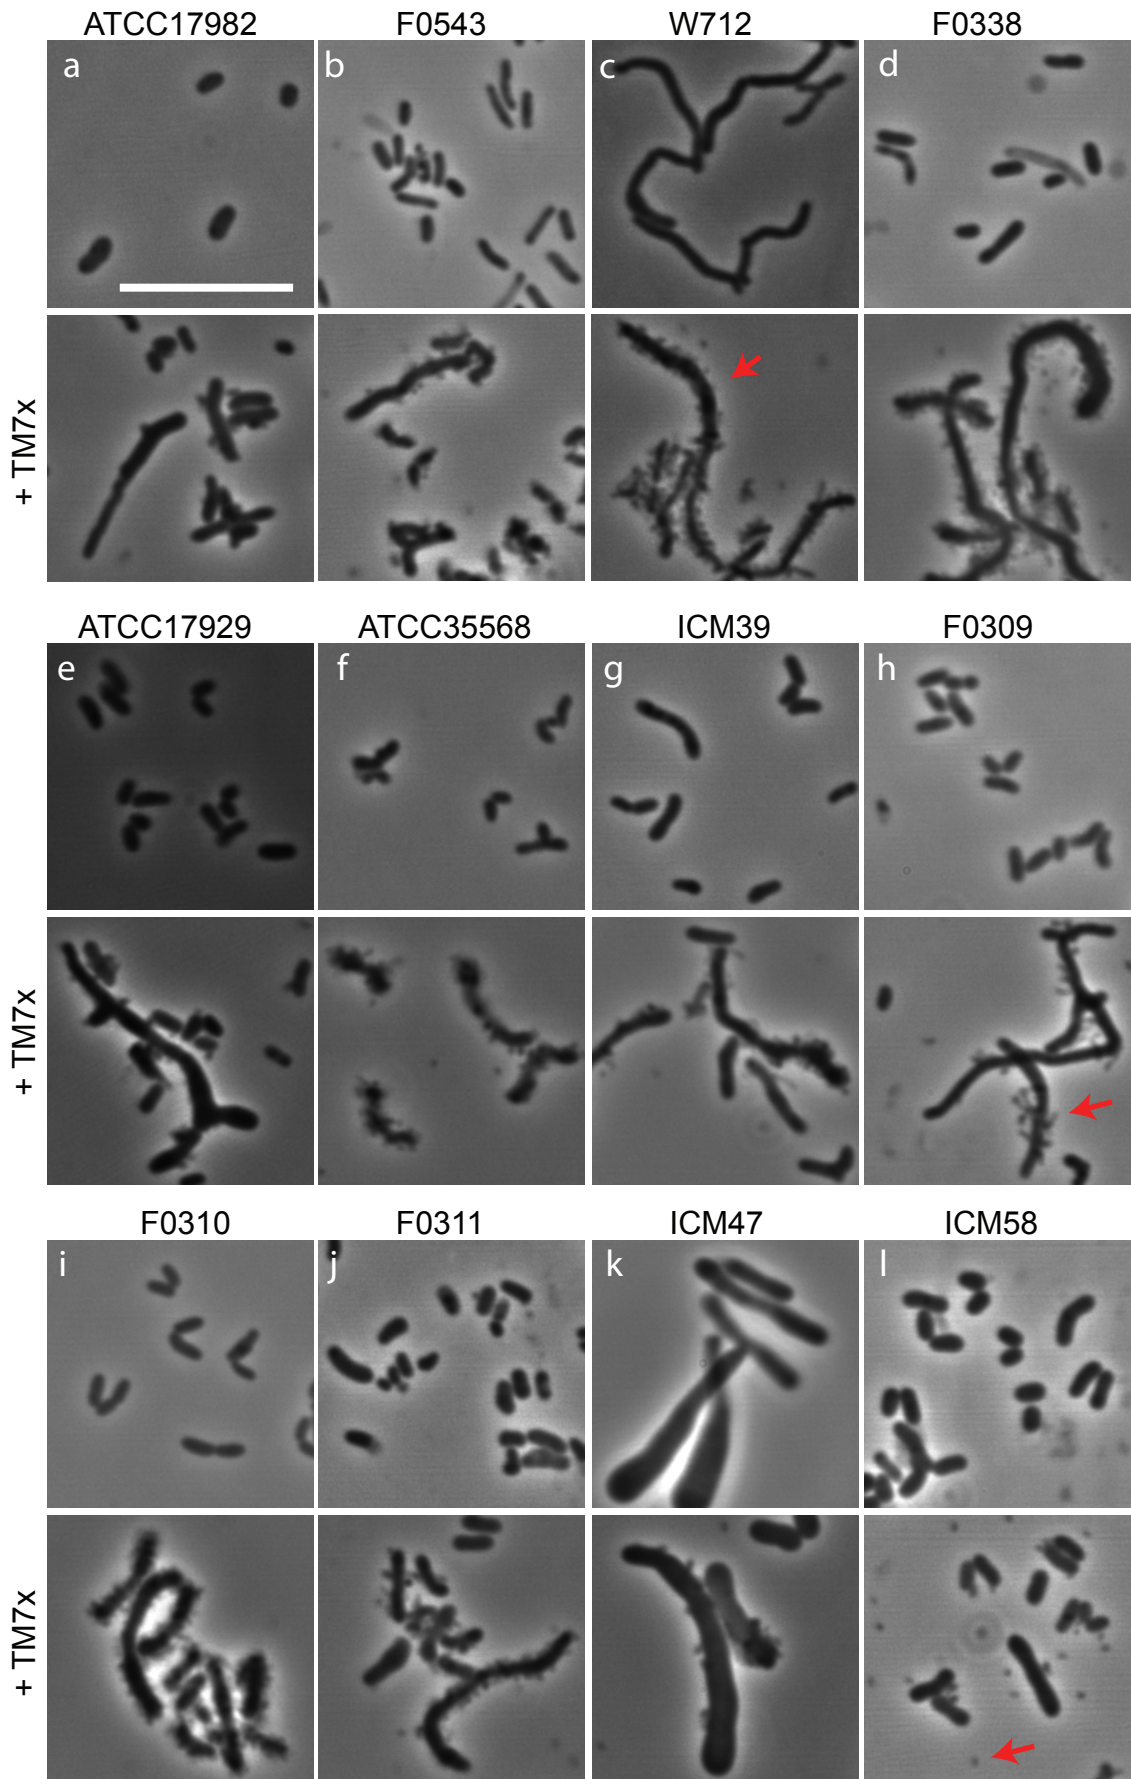

Supplement: 41396_2020_736_MOESM3_ESM.pdf [file 41396_2020_736_MOESM3_ESM.pdf]
